# Supplementary material for: Development of titania coatings containing calcium, phosphorus, and silver, applied via the sol–gel method and dip-coating technique
Source: Royal Society of Chemistry journal article supplement (doi:10.1039/d4ma00941j), 2024-12-05

## Development of Titania Coatings Containing Calcium, Phosphorus, and Silver, Applied via the Sol-Gel Method and Dip-Coating Technique

Karolína Opavová,<sup>\*a</sup> Diana Horkavcová,<sup>a</sup> Eva Jablonská,<sup>b</sup> Lucie Mrázková,<sup>b</sup> and Anna Bašusová<sup>b</sup>

### 1. EDS analyses of fired coatings – selected major elements

**Table I.a** Results of EDS analyses – Grinding

| Coating | Place of analysis | Ti    | Elements [hm. %] |      |       |
|---------|-------------------|-------|------------------|------|-------|
|         |                   |       | Ca               | P    | Ag    |
| TCP     | Entire coating    | 55.05 | 7.32             | 0.33 | -     |
|         | Intercrater area  | 59.86 | 7.18             | 0.30 | -     |
|         | “crater”          | 54.34 | 8.58             | 0.22 | -     |
| TCP05   | Entire coating    | 58.96 | 7.48             | 0.36 | 1.47  |
|         | Intercrater area  | 61.55 | 7.10             | 0.51 | 1.06  |
|         | “crater”          | 49.07 | 12.77            | -    | 0.64  |
|         | Area of silver    | 11.75 | 4.00             | 0.24 | 67.27 |
| TCP07   | Entire coating    | 58.74 | 7.24             | 0.45 | 2.12  |
|         | Intercrater area  | 64.80 | 5.17             | 0.36 | 0.94  |
|         | “crater”          | 50.76 | 12.21            | 0.27 | 1.63  |
|         | Area of silver    | 31.50 | 12.59            | 0.63 | 29.02 |

**Table I.b** Results of EDS analyses – Etching

| Coating | Place of analysis | Ti    | Elements [hm. %] |      |       |
|---------|-------------------|-------|------------------|------|-------|
|         |                   |       | Ca               | P    | Ag    |
| TCP     | Entire coating    | 39.13 | 4.88             | 0.14 | -     |
|         | Intercrater area  | 47.51 | 1.52             | 0.11 | -     |
|         | “crater”          | 45.83 | 2.18             | -    | -     |
| TCP05   | Entire coating    | 35.09 | 7.98             | 0.17 | 0.72  |
|         | Intercrater area  | 46.36 | 1.80             | -    | 0.44  |
|         | “crater”          | 34.52 | 8.85             | 0.08 | 0.86  |
|         | Area of silver    | 4.90  | 1.68             | -    | 60.74 |
| TCP07   | Entire coating    | 39.99 | 5.58             | 0.24 | 1.27  |
|         | Intercrater area  | 47.49 | 1.22             | -    | 0.43  |
|         | “crater”          | 38.88 | 12.89            | -    | 0.79  |
|         | Area of silver    | 36.56 | 0.64             | -    | 12.81 |

**Table I.c** Results of EDS analyses – Blasting

| Coating | Place of analysis | Ti    | Ca    | Elements [hm. %] |       |       |
|---------|-------------------|-------|-------|------------------|-------|-------|
|         |                   |       |       | P                | Ag    | Al    |
| TCP     | Entire coating    | 50.93 | 7.85  | 0.31             | -     | 4.85  |
|         | Intercrater area  | 52.35 | 7.56  | 0.54             | -     | 1.45  |
|         | “crater”          | 26.99 | 21.30 | 0.46             | -     | 1.51  |
| TCP05   | Entire coating    | 50.86 | 8.36  | 0.24             | 0.96  | 2.66  |
|         | Intercrater area  | 48.63 | 9.39  | 0.23             | 0.94  | 0.89  |
|         | “crater”          | 10.01 | 29.44 | 0.57             | -     | 0.63  |
|         | Area of silver    | 17.67 | 1.54  | -                | 58.75 | 1.20  |
| TCP07   | Entire coating    | 59.42 | 5.24  | 0.21             | 0.81  | 2.64  |
|         | Intercrater area  | 30.71 | 14.26 | 0.59             | 1.46  | 17.48 |
|         | “crater”          | 49.96 | 22.00 | 0.25             | 1.70  | 0.33  |
|         | Area of silver    | 38.94 | 13.47 | 0.40             | 13.95 | 0.43  |

## 2. Diffractograms obtained from measurements of samples after *in vitro* bioactivity tests (XRD)

### Supplement I.a XRD diffractogram – Blasting TCP (static *in vitro* test)

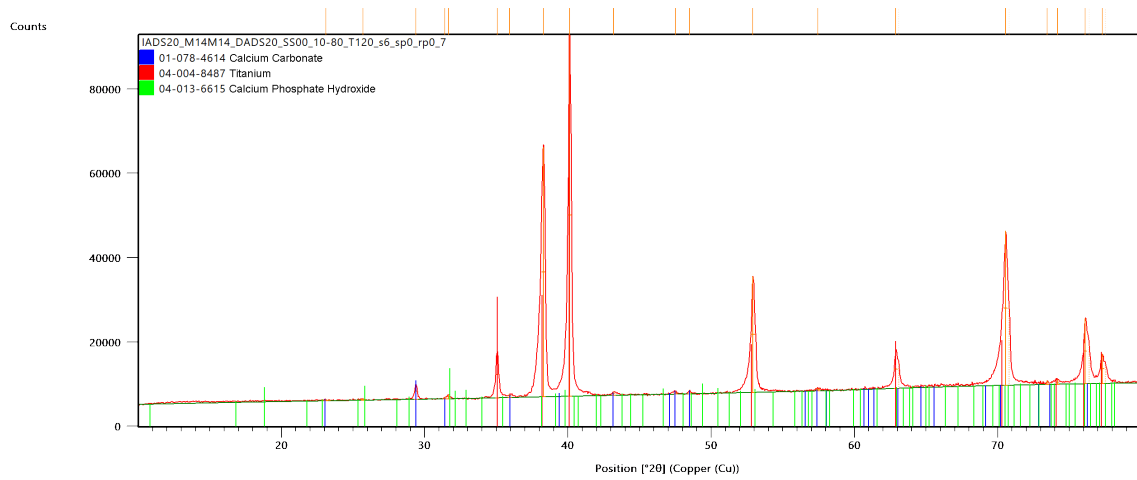

### Supplement I.b XRD diffractogram – Blasting TACP05 (static *in vitro* test)

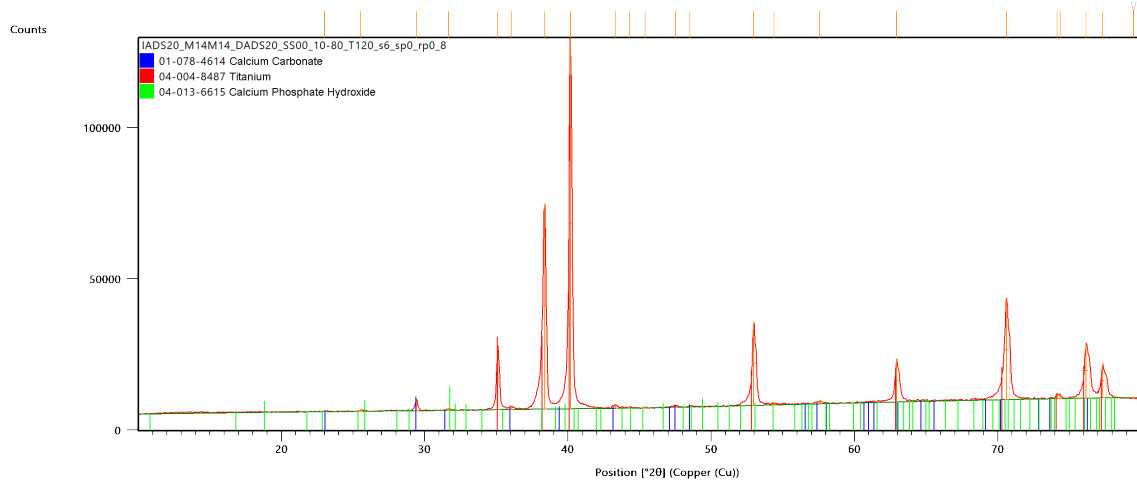

### Supplement I.c XRD diffractogram – Blasting TACP07 (static *in vitro* test)

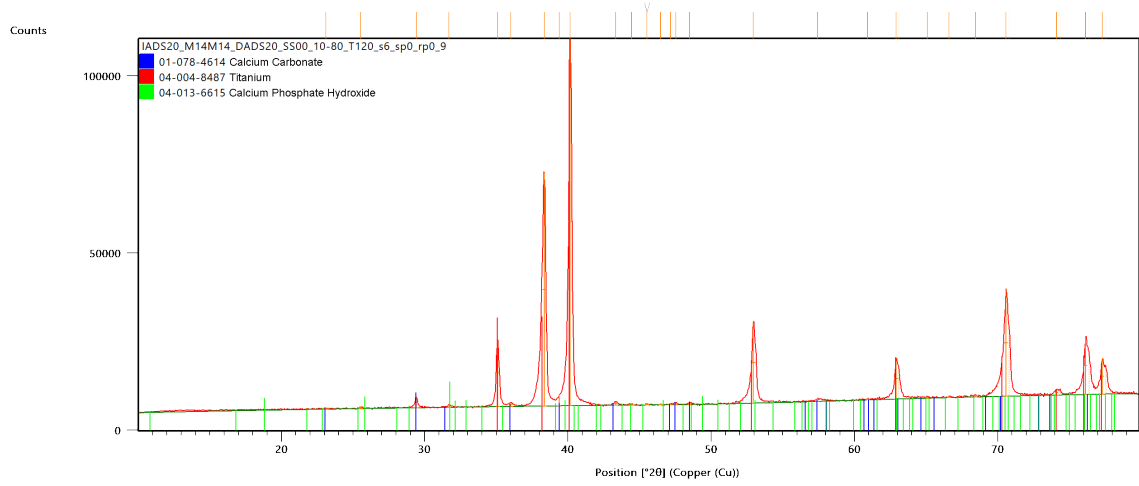

### Supplement I.d XRD diffractogram – Etching TCP (static-dynamic *in vitro* test)

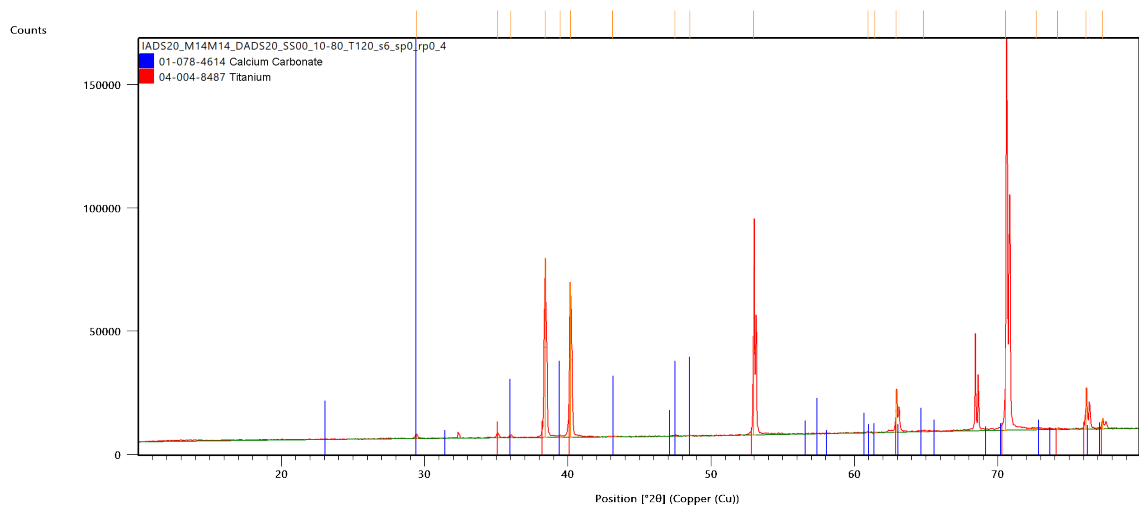

### Supplement I.e XRD diffractogram – Etching TACP05 (static-dynamic *in vitro* test)

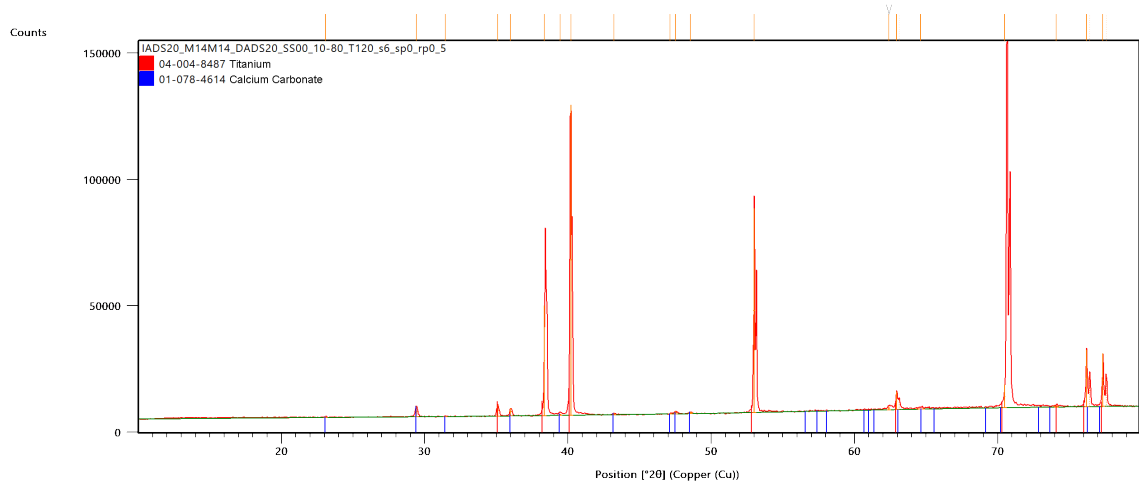

### Supplement I.f XRD diffractogram – Etching TACP07 (static-dynamic *in vitro* test)

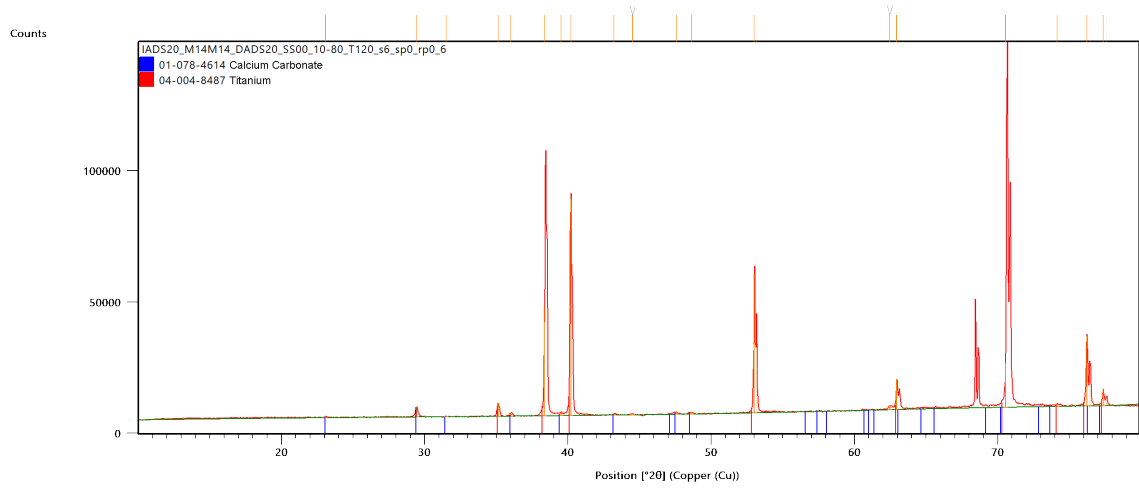

### Supplement I.g XRD diffractogram – Blasting TCP (static-dynamic *in vitro* test)

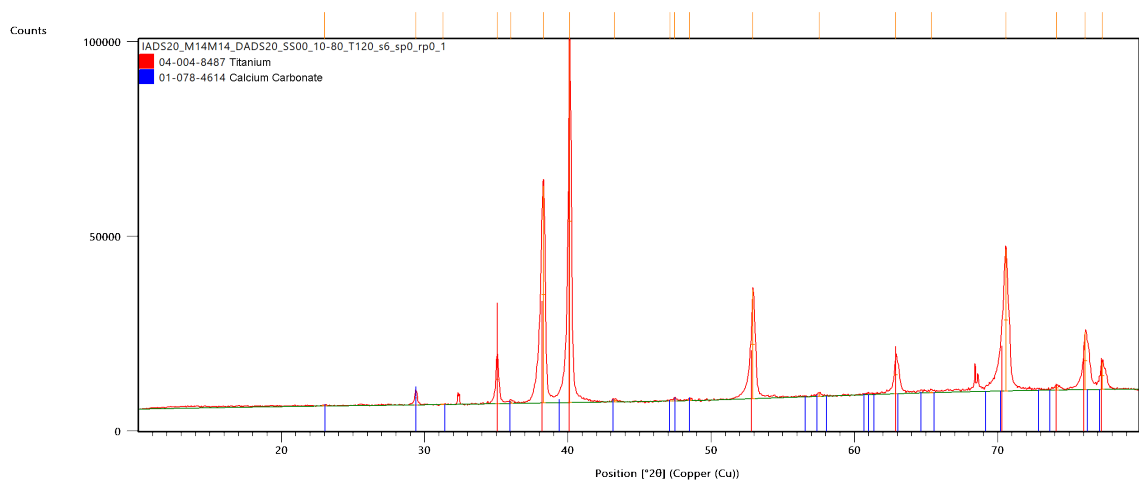

### Supplement I.h XRD diffractogram – Blasting TACP05 (static-dynamic *in vitro* test)

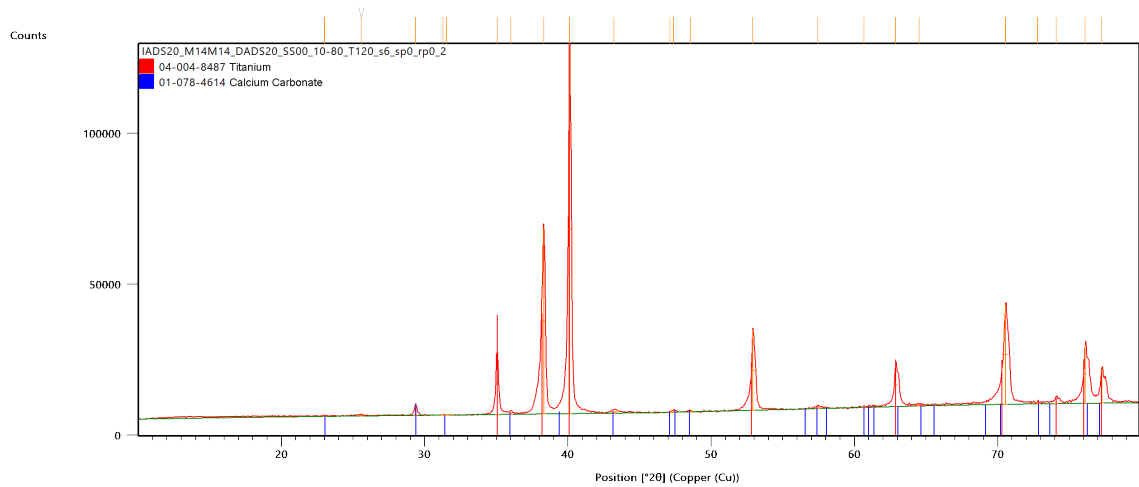

### Supplement I.i XRD diffractogram – Blasting TACP07 (static-dynamic *in vitro* test)

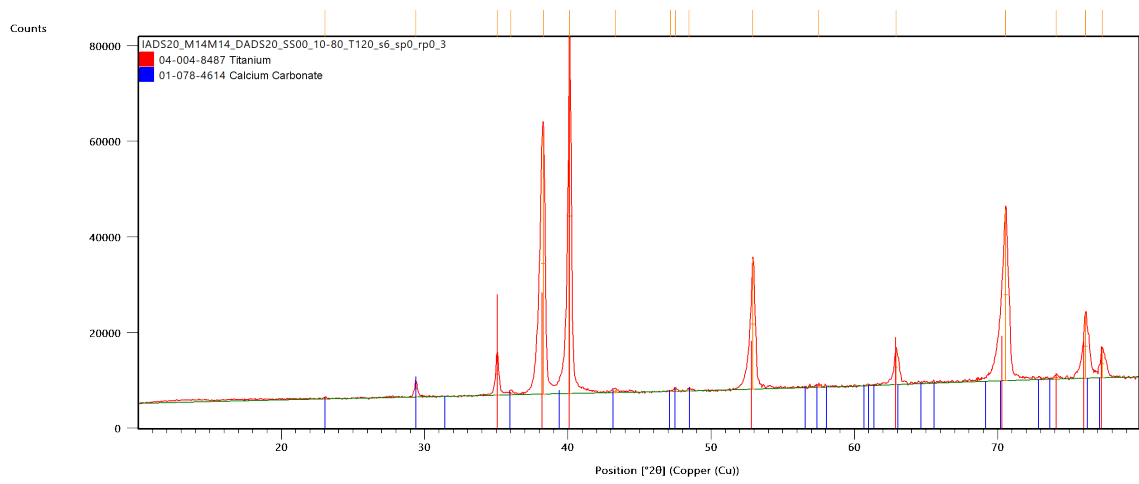

Supplement: d4ma00941j1.pdf [file d4ma00941j1.pdf]
